# Supplementary material for: Contents and Intensity of Services in Low- and High-Fidelity Programs for Supported Employment: Results of a Longitudinal Survey
Source: Atypon-hosted journal article supplement (doi:10.1176/appi.ps.201900255), 2020-01-03
Supplement: appi.ps.201900255.ds001.pdf [file appi.ps.201900255.ds001.pdf]

**Supplementary Figure 1: Flow diagram of recruitment process**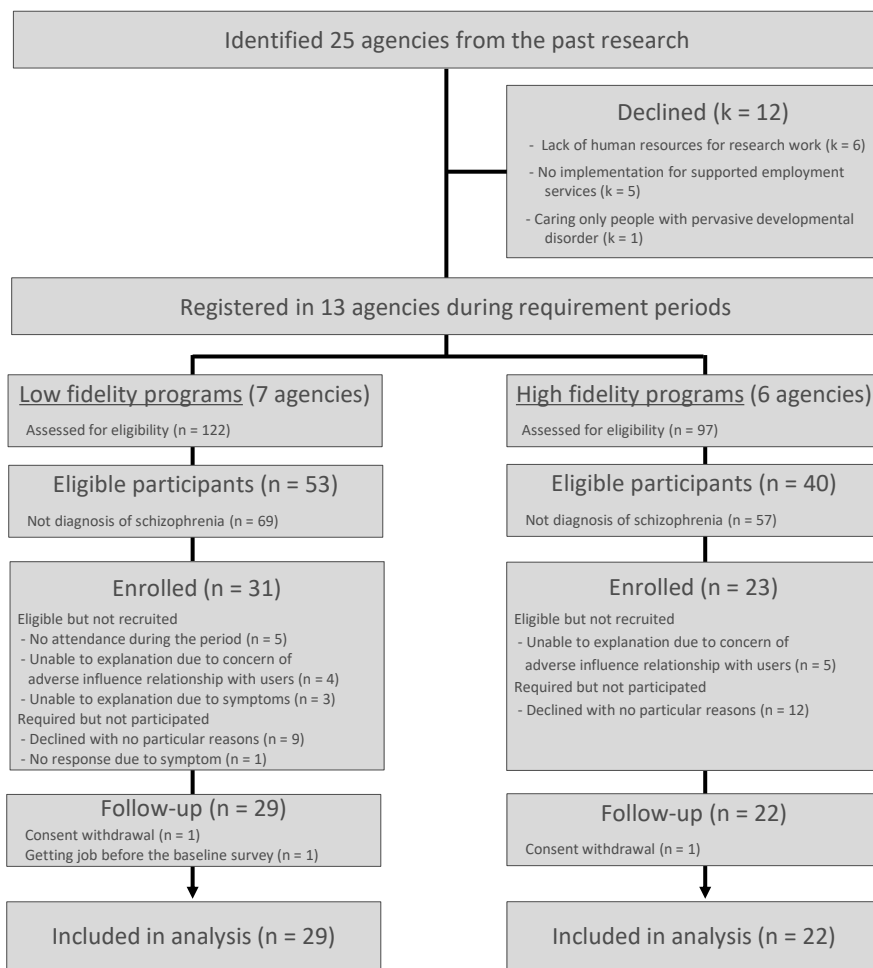**Explanation of recruitment process**

We identified 25 agencies, which at least partly provided supported employment programs for people with mental illness, from previous fidelity research. Six agencies could not participate in this study due to a lack of human resources for research work. Five no longer implemented supported employment services, and one cared only for people with pervasive developmental disorders. Of the twelve non-participating agencies, eight were community employment service agencies and the rest were in medical institutions. Thirteen programs participated in the study.

During the recruitment period, 93 clients met the inclusion criteria. The low-fidelity and high-fidelity groups had 31 and 23 consenting participants (consent rates 58.4% vs. 57.5%), respectively. About half of those who declined voluntary participation did not provide a particular reason. For a quarter of the non-participants, the staff did not explain the study because participation may have jeopardized therapeutic relationships. One subject from each group withdrew consent, and one in the low-fidelity group was excluded after violating the eligibility criteria during the follow-up period. Consequently, the analyses included 51 participants. There were no significant differences in demographic characteristics, the GAF score and the motivation scale score between the analysis sample and the drop-out sample.

**Supplementary Table 1: The codes in inventory sheets for employment specialist and case manager**

| Employment specialist                                           |                                                                                                   | Case manager                                                            |                                                                                                   |
|-----------------------------------------------------------------|---------------------------------------------------------------------------------------------------|-------------------------------------------------------------------------|---------------------------------------------------------------------------------------------------|
| Assessment                                                      | Outreach services<br>Agency-based services<br>Tel/Email services                                  | Assessment                                                              | Outreach services<br>Agency-based services<br>Tel/Email services                                  |
| Job counseling                                                  | Outreach services<br>Agency-based services<br>Tel/Email services                                  | Individual life counseling                                              | Outreach services<br>Agency-based services<br>Tel/Email services                                  |
| Individual training for business skills                         | Outreach services<br>Agency-based services<br>Tel/Email services                                  | Individual life skill training                                          | Outreach services<br>Agency-based services<br>Tel/Email services                                  |
| Job development                                                 | Outreach services<br>Agency-based services<br>Tel/Email services                                  | Counseling for keeping job/<br>on-site job support                      | Outreach services<br>Agency-based services<br>Tel/Email services                                  |
| Counseling to keep job/<br>on-site job support                  | Outreach services<br>Agency-based services<br>Tel/Email services                                  | Managing services from other agencies                                   | Outreach services<br>Agency-based services<br>Tel/Email services                                  |
| Managing services from other agencies                           | Outreach services<br>Agency-based services<br>Tel/Email services                                  | Managing services from other professionals in the same agencies         | Outreach services<br>Agency-based services<br>Tel/Email services                                  |
| Managing services from other professionals in the same agencies | Outreach services<br>Agency-based services<br>Tel/Email services                                  | Case meetings                                                           | Outreach services<br>Agency-based services<br>Tel/Email services                                  |
| Medical and living support from employment specialists          | Outreach services<br>Agency-based services<br>Tel/Email services                                  | Individual employment services (e.g., job counselling, job development) | Outreach services<br>Agency-based services<br>Tel/Email services                                  |
|                                                                 |                                                                                                   | Family support                                                          | Outreach services<br>Agency-based services<br>Tel/Email services                                  |
| Other                                                           | Outreach services<br>Agency-based services<br>Tel/Email services                                  | Other                                                                   | Outreach services<br>Agency-based services<br>Tel/Email services                                  |
| Group service                                                   | Work skills<br>Cognitive rehabilitation<br>Illness management<br>Recreation & physical activities | Group services                                                          | Work skills<br>Cognitive rehabilitation<br>Illness management<br>Recreation & physical activities |

***Detailed explanation about use of service hours that combine employment specialists and case managers***

In the analysis, we used service hours, which combine employment specialists and case managers, as the dependent variable rather than employment specialist only. Integration of vocational and mental health services is an essential factor for effective supported employment services as shown in both fidelity scales (items #4 and #5 in IPS-25 and JiSEF) (10, 11). Particularly in an interdisciplinary team, case managers are expected to provide support to users' new needs that arise during their job-hunting activities and work life (30, 31).

**Supplementary Table 2: Total service hours per month between groups during 12-month study period**

|                                         | Low-fidelity group<br>(n = 29) |             |                        | High-fidelity group<br>(n = 22) |            |                        |
|-----------------------------------------|--------------------------------|-------------|------------------------|---------------------------------|------------|------------------------|
|                                         | Mean                           | SD          | Percentage<br>of total | Mean                            | SD         | Percentage<br>of total |
| <b>Total</b>                            | <b>18.6</b>                    | <b>17.1</b> |                        | <b>10.9</b>                     | <b>7.7</b> |                        |
| - Employment specialist                 | 13.2                           | 17.8        |                        | 6.2                             | 3.3        |                        |
| - Case manager                          | 5.4                            | 7.3         |                        | 4.7                             | 6.6        |                        |
| <b>Tel or E-mail services</b>           | <b>0.1</b>                     | <b>0.1</b>  | <b>0.5%</b>            | <b>0.4</b>                      | <b>0.4</b> | <b>3.5%</b>            |
| - Employment specialist                 | 0.1                            | 0.1         |                        | 0.3                             | 0.3        |                        |
| - Case manager                          | 0.0                            | 0.1         |                        | 0.1                             | 0.3        |                        |
| <b>Outreach services</b>                | <b>1.8</b>                     | <b>2.5</b>  | <b>9.6%</b>            | <b>3.2</b>                      | <b>2.1</b> | <b>29.0%</b>           |
| - Employment specialist                 | 1.7                            | 2.6         |                        | 2.9                             | 1.8        |                        |
| - Case manager                          | 0.1                            | 0.2         |                        | 0.3                             | 0.5        |                        |
| <b>Agency-based individual services</b> | <b>1.2</b>                     | <b>0.7</b>  | <b>6.7%</b>            | <b>3.9</b>                      | <b>3.9</b> | <b>35.6%</b>           |
| - Employment specialist                 | 1.0                            | 0.7         |                        | 1.9                             | 1.6        |                        |
| - Case manager                          | 0.3                            | 0.4         |                        | 1.9                             | 4.1        |                        |
| <b>Agency-based group services</b>      | <b>15.4</b>                    | <b>14.8</b> | <b>83.2%</b>           | <b>3.5</b>                      | <b>3.9</b> | <b>31.9%</b>           |
| - Employment specialist                 | 10.4                           | 15.3        |                        | 1.1                             | 1.5        |                        |
| - Case manager                          | 5.1                            | 7.1         |                        | 2.4                             | 3.3        |                        |

**Supplementary Figure 2: Service process in the LOW-fidelity supported employment programs**

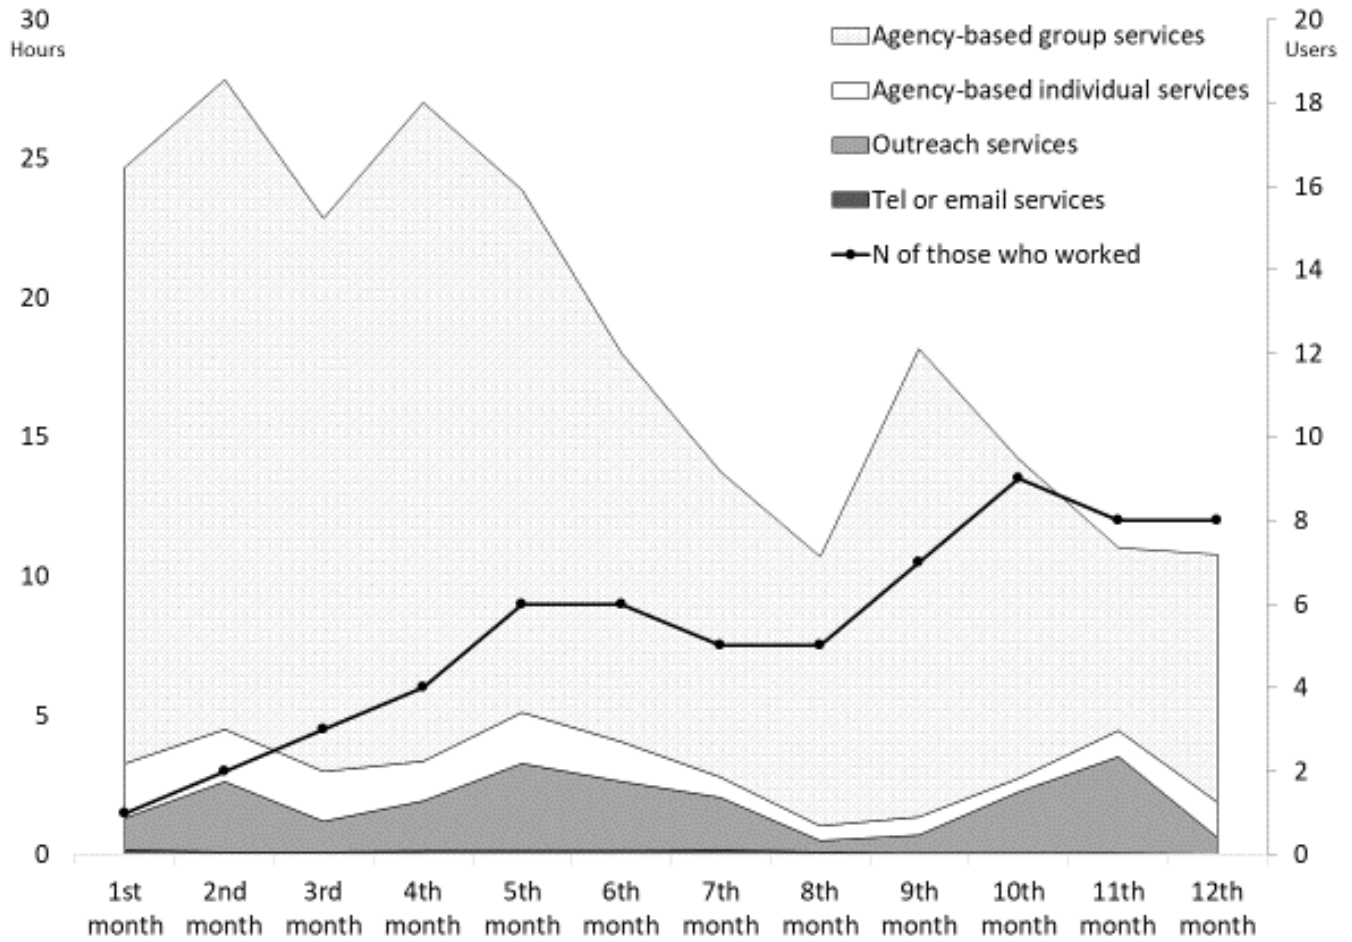

**Supplementary Figure 3: Service process in the HIGH-fidelity supported employment programs**

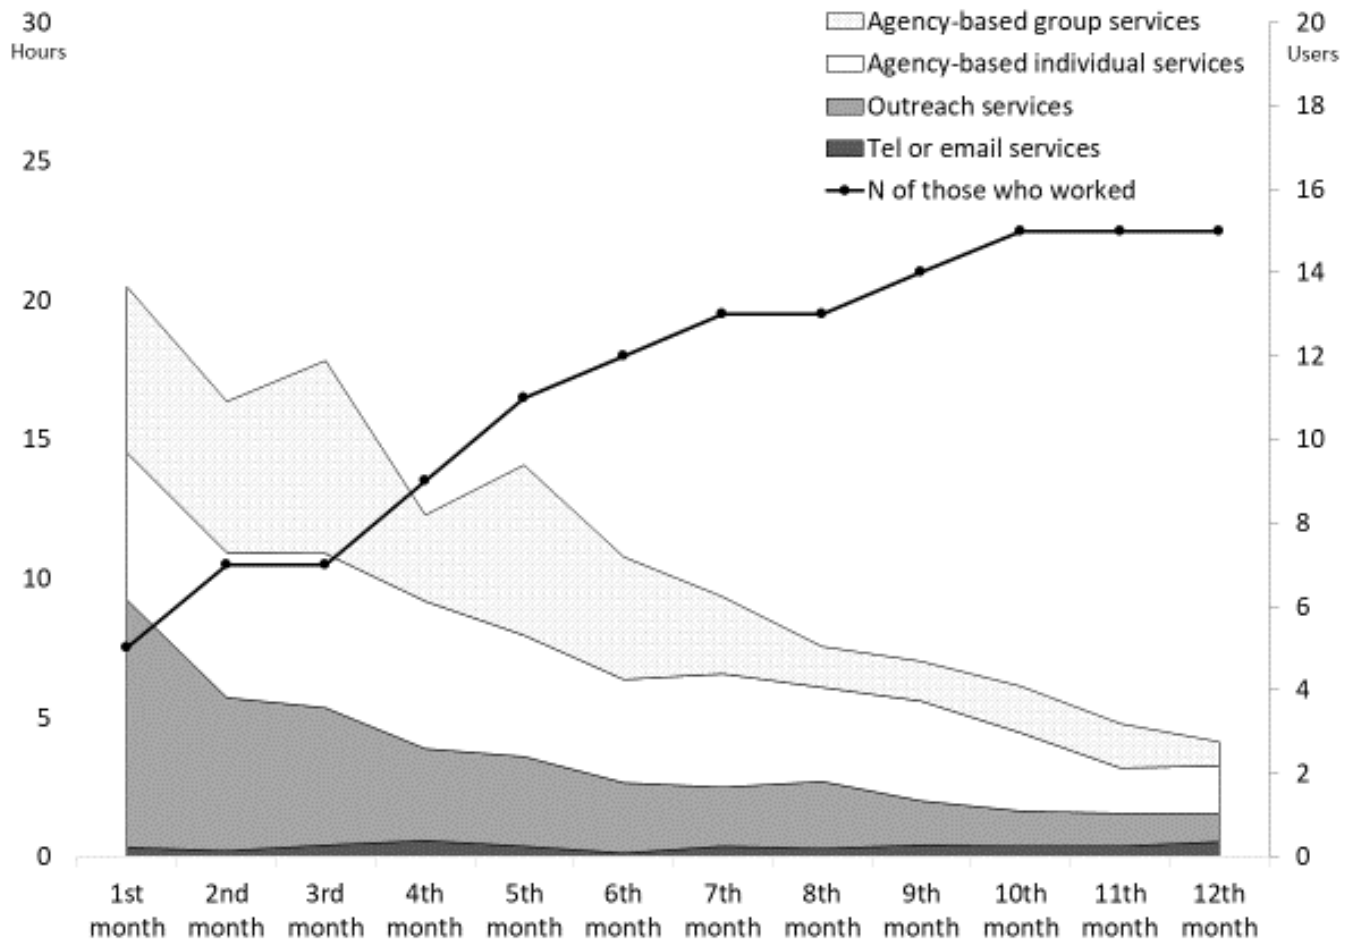

Supplementary Table 3: Hours for each category at each month in the low-fidelity group

|                                         | 1st month   |             | 2nd month   |             | 3rd month   |             | 4th month   |             | 5th month   |             | 6th month   |             | 7th month   |             | 8th month  |             | 9th month   |             | 10th month  |             | 11th month |            | 12th month |             |
|-----------------------------------------|-------------|-------------|-------------|-------------|-------------|-------------|-------------|-------------|-------------|-------------|-------------|-------------|-------------|-------------|------------|-------------|-------------|-------------|-------------|-------------|------------|------------|------------|-------------|
| <b>Low-fidelity group (n = 29)</b>      |             |             |             |             |             |             |             |             |             |             |             |             |             |             |            |             |             |             |             |             |            |            |            |             |
|                                         | <i>M</i>    | <i>SD</i>   | <i>M</i>   | <i>SD</i>   | <i>M</i>    | <i>SD</i>   | <i>M</i>    | <i>SD</i>   | <i>M</i>   | <i>SD</i>  | <i>M</i>   | <i>SD</i>   |
| <b>Tel or email services</b>            | <b>0.2</b>  | <b>0.3</b>  | <b>0.1</b>  | <b>0.2</b>  | <b>0.1</b>  | <b>0.2</b>  | <b>0.1</b>  | <b>0.3</b>  | <b>0.1</b>  | <b>0.3</b>  | <b>0.1</b>  | <b>0.3</b>  | <b>0.2</b>  | <b>0.5</b>  | <b>0.1</b> | <b>0.2</b>  | <b>0.1</b>  | <b>0.2</b>  | <b>0.1</b>  | <b>0.1</b>  | <b>0.0</b> | <b>0.1</b> | <b>0.0</b> | <b>0.1</b>  |
| - Employment specialist                 | 0.1         | 0.3         | 0.1         | 0.2         | 0.1         | 0.2         | 0.1         | 0.3         | 0.1         | 0.3         | 0.1         | 0.2         | 0.2         | 0.5         | 0.1        | 0.2         | 0.0         | 0.1         | 0.0         | 0.1         | 0.0        | 0.1        | 0.0        | 0.1         |
| - Case manager                          | 0.0         | 0.1         | 0.0         | 0.0         | 0.0         | 0.0         | 0.0         | 0.0         | 0.0         | 0.1         | 0.0         | 0.1         | 0.0         | 0.2         | 0.0        | 0.1         | 0.0         | 0.2         | 0.0         | 0.1         | 0.0        | 0.1        | 0.0        | 0.0         |
| <b>Outreach services</b>                | <b>1.1</b>  | <b>3.0</b>  | <b>2.5</b>  | <b>5.7</b>  | <b>1.1</b>  | <b>1.6</b>  | <b>1.8</b>  | <b>3.8</b>  | <b>3.1</b>  | <b>6.5</b>  | <b>2.5</b>  | <b>4.6</b>  | <b>1.9</b>  | <b>4.9</b>  | <b>0.4</b> | <b>1.4</b>  | <b>0.6</b>  | <b>1.5</b>  | <b>2.2</b>  | <b>6.5</b>  | <b>3.5</b> | <b>9.6</b> | <b>0.6</b> | <b>1.3</b>  |
| - Employment specialist                 | 1.1         | 3.0         | 2.5         | 5.8         | 1.0         | 1.6         | 1.7         | 3.8         | 3.0         | 6.5         | 2.4         | 4.5         | 1.9         | 4.9         | 0.4        | 1.4         | 0.6         | 1.5         | 2.2         | 6.5         | 3.4        | 9.6        | 0.6        | 1.3         |
| - Case manager                          | 0.1         | 0.3         | 0.1         | 0.4         | 0.1         | 0.4         | 0.1         | 0.4         | 0.1         | 0.4         | 0.1         | 0.4         | 0.0         | 0.0         | 0.0        | 0.0         | 0.0         | 0.2         | 0.0         | 0.0         | 0.0        | 0.2        | 0.0        | 0.0         |
| <b>Agency-based individual services</b> | <b>2.0</b>  | <b>2.1</b>  | <b>1.9</b>  | <b>1.7</b>  | <b>1.8</b>  | <b>1.9</b>  | <b>1.4</b>  | <b>1.5</b>  | <b>1.9</b>  | <b>2.5</b>  | <b>1.4</b>  | <b>2.1</b>  | <b>0.7</b>  | <b>1.0</b>  | <b>0.5</b> | <b>0.8</b>  | <b>0.6</b>  | <b>1.1</b>  | <b>0.5</b>  | <b>0.9</b>  | <b>0.9</b> | <b>1.8</b> | <b>1.3</b> | <b>2.8</b>  |
| - Employment specialist                 | 1.7         | 2.1         | 1.5         | 1.7         | 1.1         | 1.4         | 0.9         | 1.3         | 1.4         | 1.9         | 1.2         | 2.0         | 0.6         | 1.0         | 0.5        | 0.8         | 0.4         | 1.1         | 0.3         | 0.5         | 0.8        | 1.7        | 1.2        | 2.8         |
| - Case manager                          | 0.3         | 0.6         | 0.3         | 0.6         | 0.7         | 1.3         | 0.5         | 0.9         | 0.5         | 1.2         | 0.2         | 0.5         | 0.1         | 0.3         | 0.0        | 0.1         | 0.2         | 0.5         | 0.2         | 0.7         | 0.1        | 0.4        | 0.1        | 0.2         |
| <b>Agency-based group services</b>      | <b>21.4</b> | <b>24.9</b> | <b>23.3</b> | <b>28.9</b> | <b>19.9</b> | <b>19.7</b> | <b>23.7</b> | <b>26.7</b> | <b>18.8</b> | <b>20.2</b> | <b>14.0</b> | <b>18.1</b> | <b>11.0</b> | <b>16.6</b> | <b>9.7</b> | <b>15.9</b> | <b>16.8</b> | <b>27.3</b> | <b>11.4</b> | <b>19.0</b> | <b>6.6</b> | <b>9.6</b> | <b>8.9</b> | <b>16.4</b> |
| - Employment specialist                 | 16.0        | 23.3        | 16.7        | 29.1        | 12.1        | 18.4        | 14.3        | 26.3        | 12.9        | 21.5        | 9.4         | 16.4        | 6.8         | 14.3        | 6.0        | 13.2        | 12.7        | 27.0        | 7.8         | 17.5        | 3.6        | 6.2        | 6.2        | 15.0        |
| - Case manager                          | 5.4         | 12.0        | 6.7         | 11.1        | 7.7         | 12.0        | 9.3         | 15.6        | 5.9         | 9.3         | 4.6         | 8.8         | 4.2         | 8.1         | 3.7        | 8.9         | 4.1         | 9.9         | 3.6         | 9.6         | 3.0        | 6.7        | 2.7        | 7.0         |
| Cumulative sum of service time (%)      | 11%         |             | 24%         |             | 34%         |             | 46%         |             | 57%         |             | 65%         |             | 71%         |             | 76%        |             | 84%         |             | 90%         |             | 95%        |            | 100%       |             |
| <b>High-fidelity group (n = 22)</b>     |             |             |             |             |             |             |             |             |             |             |             |             |             |             |            |             |             |             |             |             |            |            |            |             |
|                                         | <i>M</i>    | <i>SD</i>   | <i>M</i>   | <i>SD</i>   | <i>M</i>    | <i>SD</i>   | <i>M</i>    | <i>SD</i>   | <i>M</i>   | <i>SD</i>  | <i>M</i>   | <i>SD</i>   |
| <b>Tel or email services</b>            | <b>0.3</b>  | <b>0.6</b>  | <b>0.2</b>  | <b>0.3</b>  | <b>0.4</b>  | <b>0.6</b>  | <b>0.6</b>  | <b>0.8</b>  | <b>0.4</b>  | <b>0.4</b>  | <b>0.2</b>  | <b>0.3</b>  | <b>0.4</b>  | <b>0.6</b>  | <b>0.3</b> | <b>0.8</b>  | <b>0.4</b>  | <b>0.7</b>  | <b>0.4</b>  | <b>0.7</b>  | <b>0.4</b> | <b>0.8</b> | <b>0.6</b> | <b>1.3</b>  |
| - Employment specialist                 | 0.2         | 0.5         | 0.2         | 0.3         | 0.4         | 0.6         | 0.5         | 0.7         | 0.3         | 0.4         | 0.2         | 0.3         | 0.3         | 0.6         | 0.1        | 0.2         | 0.3         | 0.4         | 0.3         | 0.5         | 0.2        | 0.6        | 0.2        | 0.4         |
| - Case manager                          | 0.1         | 0.4         | 0.0         | 0.1         | 0.0         | 0.1         | 0.0         | 0.1         | 0.0         | 0.1         | 0.0         | 0.0         | 0.1         | 0.3         | 0.2        | 0.8         | 0.2         | 0.5         | 0.1         | 0.4         | 0.2        | 0.5        | 0.3        | 1.2         |
| <b>Outreach services</b>                | <b>8.9</b>  | <b>8.7</b>  | <b>5.5</b>  | <b>6.5</b>  | <b>4.9</b>  | <b>6.6</b>  | <b>3.3</b>  | <b>2.8</b>  | <b>3.2</b>  | <b>4.2</b>  | <b>2.5</b>  | <b>4.1</b>  | <b>2.1</b>  | <b>2.9</b>  | <b>2.4</b> | <b>3.5</b>  | <b>1.6</b>  | <b>2.8</b>  | <b>1.3</b>  | <b>2.4</b>  | <b>1.2</b> | <b>2.5</b> | <b>1.0</b> | <b>1.3</b>  |
| - Employment specialist                 | 8.4         | 8.9         | 5.1         | 6.0         | 4.7         | 6.4         | 3.2         | 2.8         | 2.6         | 3.4         | 2.2         | 3.8         | 1.8         | 2.4         | 2.3        | 3.5         | 1.2         | 2.7         | 1.2         | 2.4         | 1.1        | 2.2        | 0.9        | 1.3         |
| - Case manager                          | 0.5         | 1.4         | 0.4         | 1.2         | 0.3         | 0.7         | 0.1         | 0.2         | 0.7         | 2.1         | 0.3         | 0.9         | 0.3         | 1.0         | 0.1        | 0.6         | 0.4         | 1.1         | 0.1         | 0.5         | 0.1        | 0.4        | 0.0        | 0.2         |
| <b>Agency-based individual services</b> | <b>5.3</b>  | <b>4.4</b>  | <b>5.2</b>  | <b>7.1</b>  | <b>5.5</b>  | <b>9.9</b>  | <b>5.3</b>  | <b>10.3</b> | <b>4.3</b>  | <b>9.2</b>  | <b>3.7</b>  | <b>4.5</b>  | <b>4.1</b>  | <b>5.6</b>  | <b>3.4</b> | <b>7.0</b>  | <b>3.6</b>  | <b>7.5</b>  | <b>2.8</b>  | <b>4.0</b>  | <b>1.6</b> | <b>2.3</b> | <b>1.7</b> | <b>3.2</b>  |
| - Employment specialist                 | 3.3         | 2.8         | 3.0         | 2.8         | 2.7         | 3.4         | 2.3         | 2.3         | 1.6         | 1.8         | 2.3         | 3.4         | 2.2         | 3.4         | 1.4        | 1.7         | 1.0         | 1.6         | 1.3         | 1.9         | 1.2        | 2.2        | 1.0        | 1.6         |
| - Case manager                          | 2.0         | 4.7         | 2.2         | 7.2         | 2.8         | 9.9         | 3.0         | 10.5        | 2.8         | 9.0         | 1.4         | 3.6         | 1.9         | 4.7         | 2.1        | 6.5         | 2.5         | 7.1         | 1.5         | 3.8         | 0.4        | 1.1        | 0.7        | 2.8         |
| <b>Agency-based group services</b>      | <b>5.9</b>  | <b>6.6</b>  | <b>5.4</b>  | <b>6.6</b>  | <b>6.9</b>  | <b>10.5</b> | <b>3.1</b>  | <b>4.5</b>  | <b>6.1</b>  | <b>8.5</b>  | <b>4.4</b>  | <b>7.6</b>  | <b>2.8</b>  | <b>4.9</b>  | <b>1.5</b> | <b>4.3</b>  | <b>1.4</b>  | <b>3.5</b>  | <b>1.7</b>  | <b>4.1</b>  | <b>1.6</b> | <b>3.9</b> | <b>0.9</b> | <b>2.9</b>  |
| - Employment specialist                 | 2.9         | 4.4         | 3.6         | 5.1         | 2.8         | 6.7         | 0.5         | 1.2         | 1.0         | 2.9         | 0.6         | 1.9         | 0.2         | 0.5         | 0.0        | 0.2         | 0.1         | 0.6         | 0.1         | 0.5         | 1.1        | 3.7        | 0.5        | 2.5         |
| - Case manager                          | 3.1         | 5.3         | 1.9         | 3.9         | 4.2         | 9.4         | 2.6         | 4.6         | 5.1         | 8.3         | 3.8         | 6.6         | 2.6         | 4.8         | 1.4        | 4.3         | 1.3         | 3.5         | 1.6         | 4.1         | 0.5        | 1.7        | 0.4        | 1.7         |
| Cumulative sum of service time (%)      | 16%         |             | 28%         |             | 42%         |             | 51%         |             | 62%         |             | 70%         |             | 77%         |             | 83%        |             | 88%         |             | 93%         |             | 97%        |            | 100%       |             |

**Supplementary Table 4: Service hours during the work period for each category between the low- and high-fidelity groups (per month)**

|                                         | <u>Low-fidelity group</u><br>(n = 11) |             | <u>High-fidelity group</u><br>(n = 15) |            | <i>Generalized linear model</i><br>(Coefficient for group) |                   |             |
|-----------------------------------------|---------------------------------------|-------------|----------------------------------------|------------|------------------------------------------------------------|-------------------|-------------|
|                                         | Mean                                  | SD          | Mean                                   | SD         | B                                                          | 95% CI            | p           |
| <b>Total</b>                            | <b>8.6</b>                            | <b>12.3</b> | <b>3.6</b>                             | <b>3.2</b> |                                                            |                   |             |
| - Employment specialist                 | 4.1                                   | 5.2         | 2.3                                    | 1.9        |                                                            |                   |             |
| - Case manager                          | 4.5                                   | 8.8         | 1.3                                    | 2.2        |                                                            |                   |             |
| <b>Tel or E-mail services</b>           | <b>0.2</b>                            | <b>0.2</b>  | <b>0.4</b>                             | <b>0.5</b> |                                                            |                   |             |
| - Employment specialist                 | 0.1                                   | 0.2         | 0.3                                    | 0.3        |                                                            |                   |             |
| - Case manager                          | 0.0                                   | 0.0         | 0.1                                    | 0.4        |                                                            |                   |             |
| <b>Outreach services</b>                | <b>1.3</b>                            | <b>1.9</b>  | <b>1.2</b>                             | <b>1.1</b> | <b>-.2</b>                                                 | <b>-1.1, .8</b>   | <b>.715</b> |
| - Employment specialist                 | 1.3                                   | 1.9         | 1.1                                    | 1.1        |                                                            |                   |             |
| - Case manager                          | 0.0                                   | 0.0         | 0.1                                    | 0.1        |                                                            |                   |             |
| <b>Agency-based individual services</b> | <b>1.0</b>                            | <b>1.3</b>  | <b>1.5</b>                             | <b>2.0</b> | <b>.5</b>                                                  | <b>-.5, 1.5</b>   | <b>.343</b> |
| - Employment specialist                 | 0.8                                   | 1.2         | 0.7                                    | 0.6        |                                                            |                   |             |
| - Case manager                          | 0.2                                   | 0.3         | 0.8                                    | 1.7        |                                                            |                   |             |
| <b>Agency-based group services</b>      | <b>6.1</b>                            | <b>11.4</b> | <b>0.5</b>                             | <b>0.9</b> | <b>-5.6</b>                                                | <b>-11.8, 0.6</b> | <b>.076</b> |
| - Employment specialist                 | 1.8                                   | 3.8         | 0.2                                    | 0.5        |                                                            |                   |             |
| - Case manager                          | 4.3                                   | 8.6         | 0.2                                    | 0.5        |                                                            |                   |             |
